# Supplementary material for: Application of a tailor-made polymer as a selective and sensitive colorimetric sensor for reliable detection of trace levels of uranyl ions in complex matrices
Source: Royal Society of Chemistry journal article supplement (doi:10.1039/c5ra09221c), 2015-01-01
Supplement: c5ra09221c1.pdf [file c5ra09221c1.pdf]

## Electronic Supplementary Material

### **Application of a tailor-made polymer as a selective and sensitive colorimetric sensor for reliable detection of trace levels of uranyl ions in complex matrices**

Mohammad Behbahani<sup>1,\*</sup>, Sara Salimi<sup>1</sup>, Hamid Sadeghi Abandansari<sup>1</sup>, Fariborz Omid<sup>2</sup>,

Mani Salarian<sup>1</sup>, Ali Esrafil<sup>3</sup>

*<sup>1</sup> Department of Chemistry, Shahid Beheshti University, Tehran, Iran*

*<sup>2</sup> Department of Occupational Health Engineering, School of Public Health, Shahroud*

*University of Medical Sciences, Shahroud, Iran*

*<sup>3</sup> Department of Environmental Health Engineering, School of Public Health, Iran University of*

*Medical Sciences, Tehran, Iran*

\* Corresponding author Tel.: +98 21 22431661; Fax: +98 21 22431683

E-mail address: mohammadbehbahani89@yahoo.com (Mohammad Behbahani)

Fax: +98 4113333458; Tel: +98 9141028230

**Table 1S:** The chemo-sensor color changes in different water samples (Distilled, tap, Caspian, and Persian Gulf).

| Water sample       | Uranyl spiked concentration | Results                                                                               |
|--------------------|-----------------------------|---------------------------------------------------------------------------------------|
| Distilled water    | Not added                   |    |
|                    | 0.5 ppm                     |    |
| Tap water          | Not added                   |    |
|                    | 0.5 ppm                     |   |
| Caspian sea water  | Not added                   |  |
|                    | 0.5 ppm                     |  |
| Persian Gulf water | Not added                   |  |
|                    | 0.5 ppm                     |  |
